# Supplementary material
Source: Springer Nature journal article supplement (https://www.springermedizin.de/resource/supplementary/12931_2011_1181_MOESM2_ESM.pdf/9425500)

- normal control
- ▒ COPD with normal BMD
- COPD with low BMD

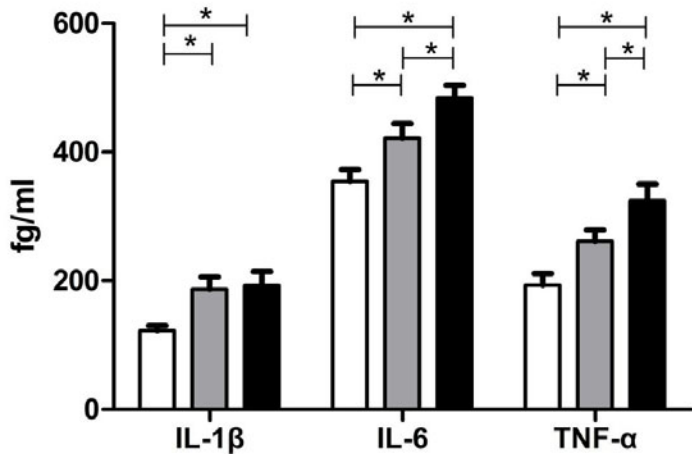

Supplement: MOESM2 [file 9425500]
